# Supplementary material
Source: MDPI journal article supplement (https://www.mdpi.com/1996-1073/14/20/6806)
Supplement: s1 [file s1]

## **Supplementary Information**

# **Bioconversion of crude glycerol into 1,3-propanediol(1,3-PDO) with bioelectrochemical system and zero-valent iron using *Klebsiella pneumoniae* L17**

**Da Seul Kong<sup>1</sup>, Eun Joo Park<sup>1</sup>, Sakuntala Mutyala<sup>1</sup>, Minsoo Kim<sup>1</sup>, Yunchul Cho<sup>2</sup>, Sang-Eun Oh<sup>3</sup>, Changman Kim<sup>4,5\*</sup> and Jung Rae Kim<sup>1,\*</sup>**

## **Corresponding authors**

**Dr. Changman Kim**

Advanced Biofuel and Bioproducts Process Development Unit,  
Lawrence Berkeley National Laboratory, Emeryville, CA, 94608, USA  
E-mail address: [cmkim0408@gmail.com](mailto:cmkim0408@gmail.com) ; Phone: +82-10-4566-2661

**Prof. Jung Rae Kim**

School of Chemical Engineering,  
Pusan National University, Busan 46241, Republic of Korea  
E-mail address: [j.kim@pusan.ac.kr](mailto:j.kim@pusan.ac.kr); Phone: +82.51.510.2393, Fax: +82.51.512.8563

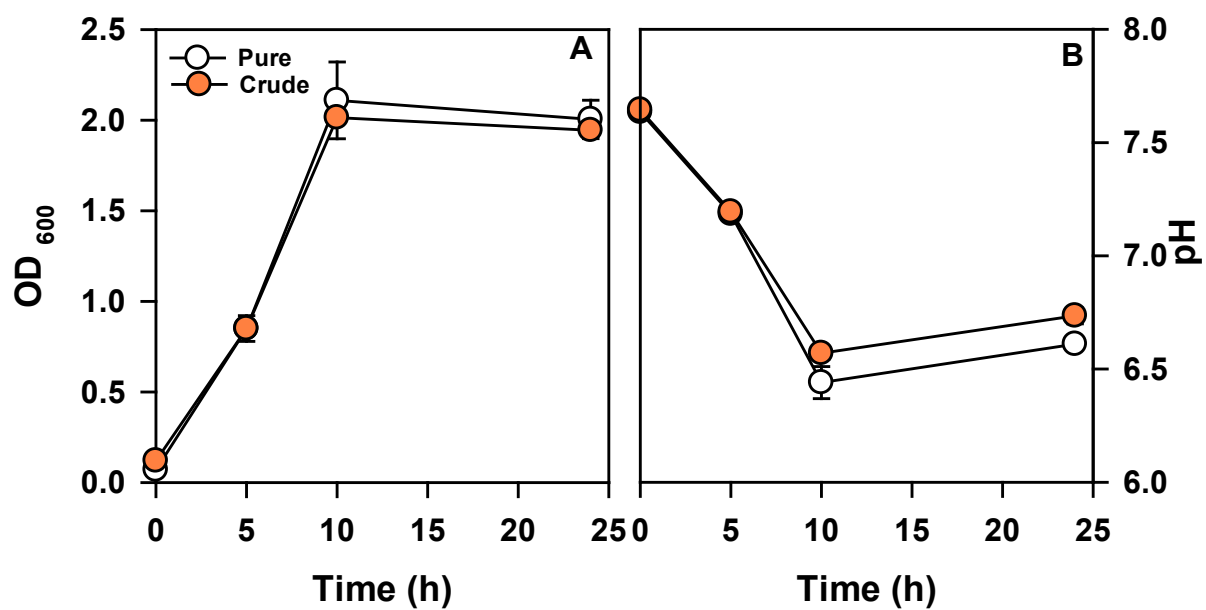

**Figure S1.** comparison OD and pH of pure and crude glycerol. (A) cell growth (OD) and (B) pH

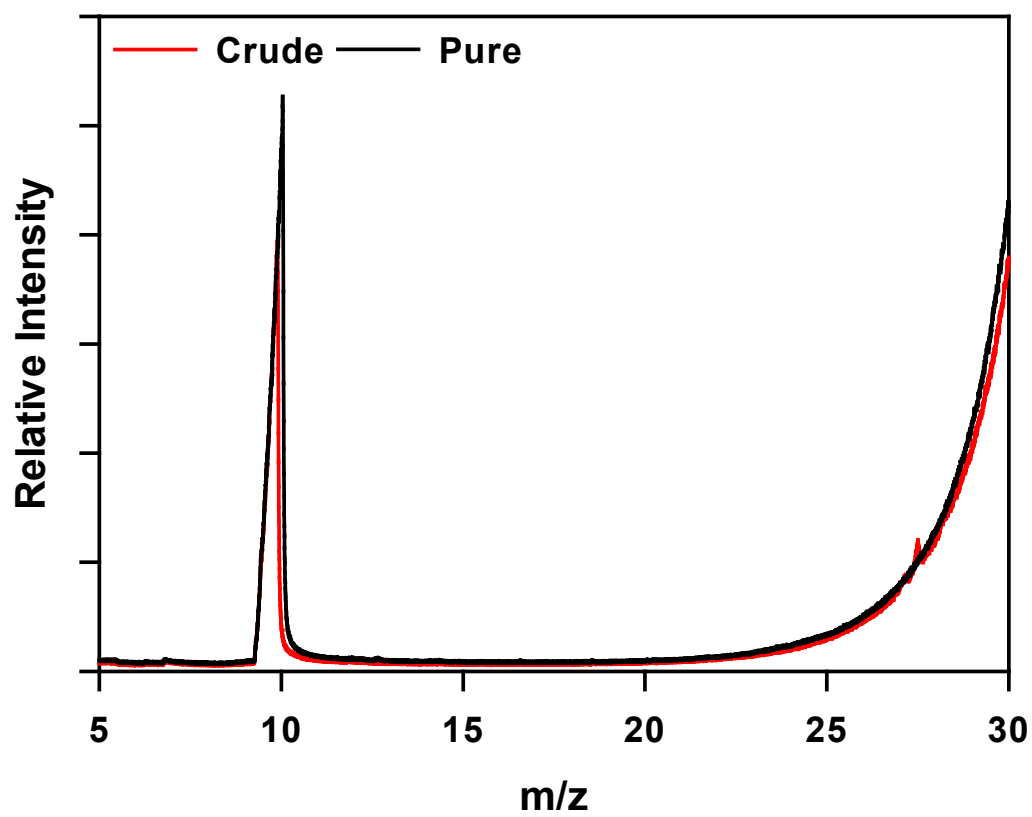

**Figure S2.** comparison of pure and crude glycerol in GC-MS. (A) cell growth (OD) and (B) pH

**Table S1. The reactions and results of in silico metabolic flux analysis**

| Reaction No. | Reaction                                                   | Crude    | Pure     |
|--------------|------------------------------------------------------------|----------|----------|
| Dipyr01      | acetyl-CoA + 2 NADH -> Ethanol + 2 NAD + CoA               | 63.5148  | 74.884   |
| Dipyr02      | Pyruvate + Q + 2 H+ -> QH2 + Acetate                       | 0        | 0        |
| Dipyr03      | acetyl-CoA + ADP -> Acetate + ATP + CoA                    | 3.7404   | 4.6889   |
| Dipyr04      | Formate -> CO2 + H2                                        | 67.2552  | 79.5729  |
| Dipyr05      | NADH + Pyruvate <=> Lactate + NAD                          | 0        | 0        |
| Dipyr06      | NADH + Oxaloacetate <=> Malate + NAD                       | 0        | 0        |
| Dipyr07      | 2 Pyruvate + NADH -> 2 CO2 + 2,3-butanediol + NAD          | 0        | 0        |
| Dipyr08      | Fumarate + NADH -> NAD + Succinate                         | 0        | 0        |
| Energy01     | NADH + Q <=> NAD + QH2 + 2 H+                              | 0        | 0        |
| Energy03     | NADPH + NAD -> NADP + NADH                                 | 33.6276  | 39.78645 |
| Energy04     | FADH + Q -> FAD + QH2                                      | 0        | 0        |
| Energy05     | NADP + NADH + 2 H+ -> NADPH + NAD                          | 33.6276  | 39.78645 |
| Energy06     | ADP + Pi + 3 H+ <=> ATP                                    | 0        | 0        |
| Energy07     | ATP + AMP <=> 2 ADP                                        | 0        | 0        |
| Energy08     | ATP -> ADP + Pi                                            | 70.9956  | 84.2618  |
| Energy09     | Formate + Q <=> H+ + 2 QH2 + CO2                           | 0        | 0        |
| Energy10     | H2 + Q -> QH2 + 2 H+                                       | 0        | 0        |
| Energy11     | ATP + NAD -> ADP + NADP                                    | 0        | 0        |
| Energy12     | Lactate + Q -> Pyruvate + QH2                              | 0        | 0        |
| Gly05        | Glyceraldehyde-3-P <=> Dihydroxyacetone-P                  | -67.2552 | -79.5729 |
| Gly06        | Glyceraldehyde-3-P + Pi + NAD <=> NADH + 1,3-biP-glycerate | 67.2552  | 79.5729  |
| Gly07        | 1,3-biP-glycerate + ADP <=> 3-P-glycerate + ATP            | 67.2552  | 79.5729  |
| Gly08        | 3-P-glycerate <=> 2-P-glycerate                            | 67.2552  | 79.5729  |
| Gly09        | 2-P-glycerate <=> PEP                                      | 67.2552  | 79.5729  |
| Gly10        | PEP + ADP -> Pyruvate + ATP                                | 67.2552  | 79.5729  |
| Gly11        | Pyruvate + ATP -> PEP + AMP + Pi                           | 0        | 0        |
| Gly12        | Pyruvate + CoA + NAD -> NADH + CO2 + acetyl-CoA            | 0        | 0        |
| Gly13        | Oxaloacetate + ATP -> PEP + CO2 + ADP                      | 0        | 0        |
| Gly14        | PEP + CO2 -> Oxaloacetate + Pi                             | 0        | 0        |
| Gly15        | CoA + Pyruvate -> acetyl-CoA + Formate                     | 67.2552  | 79.5729  |
| GlyP-01      | Glycerol + ATP -> Glycerol-3-P + ADP                       | 0        | 0        |
| GlyP-02      | Glycerol-3-P + NAD <=> Dihydroxyacetone-P + NADH           | 0        | 0        |
| GlyP-03      | Glycerol + PEP -> Glycerol-3-P + Pyruvate                  | 0        | 0        |
| GlyP-04      | Glycerol + NAD -> Dehydroxyacetone + NADH                  | 67.2552  | 79.5729  |
| GlyP-05      | ATP + Dehydroxyacetone <=> ADP + Dihydroxyacetone-P        | 67.2552  | 79.5729  |
| GlyRP-01     | Glycerol -> 3-hydroxypropionaldehyde                       | 40.4395  | 18.4513  |
| GlyRP-02     | 3-hydroxypropionaldehyde + NADH <=> 1,3-propanediol + NAD  | 23.96015 | 13.91455 |
| GlyRP-02-R   | 1,3-propanediol + NAD <=> 3-hydroxypropionaldehyde + NADH  | 0        | 0        |

|          |                                                                                                                                                                                                                                          |          |         |
|----------|------------------------------------------------------------------------------------------------------------------------------------------------------------------------------------------------------------------------------------------|----------|---------|
| GlyRP-03 | 3-hydroxypropionaldehyde + NAD -> 3-hydroxypropionate + NADH                                                                                                                                                                             | 16.47935 | 4.53675 |
| GROWTH   | 41.3 ATP + 3.5 NAD + 18.2 NADPH + 0.1 Glyceraldehyde-3-P + 1.5 3-P-glycerate + 0.5 PEP + 2.8 Pyruvate + 3.7 acetyl-CoA + 1.8 Oxaloacetate + 1.1 $\alpha$ -ketoglutarate -> 41.3 ADP + 41.3 Pi + 3.5 NADH + 18.2 NADP + 3.7 CoA + BIOMASS | 0        | 0       |
| PDO      | [1,3-propanediol] -> [1,3-PDO-ex]                                                                                                                                                                                                        | 15.3782  | 11.3689 |
| TCA01    | acetyl-CoA + Oxaloacetate -> CoA + Citrate                                                                                                                                                                                               | 0        | 0       |
| TCA02    | Citrate <-> Isocitrate                                                                                                                                                                                                                   | 0        | 0       |
| TCA03    | Isocitrate + NADP <-> CO <sub>2</sub> + NADPH + $\alpha$ -ketoglutarate                                                                                                                                                                  | 0        | 0       |
| TCA04    | $\alpha$ -ketoglutarate + NAD + CoA -> CO <sub>2</sub> + NADH + Succinyl-CoA                                                                                                                                                             | 0        | 0       |
| TCA05    | Succinyl-CoA + ADP + Pi <-> ATP + CoA + Succinate                                                                                                                                                                                        | 0        | 0       |
| TCA06    | Succinate + FAD -> FADH + Fumarate                                                                                                                                                                                                       | 0        | 0       |
| TCA07    | Fumarate + FADH -> Succinate + FAD                                                                                                                                                                                                       | 0        | 0       |
| TCA08    | Fumarate <-> Malate                                                                                                                                                                                                                      | 0        | 0       |
| TCA09    | Malate + NAD <-> NADH + Oxaloacetate                                                                                                                                                                                                     | 0        | 0       |
| TCA10    | Isocitrate -> Glyoxylate + Succinate                                                                                                                                                                                                     | 0        | 0       |
| TCA11    | Glyoxylate + acetyl-CoA -> Malate + CoA                                                                                                                                                                                                  | 0        | 0       |
| Trans03  | Acetate <-> Acetate-ex                                                                                                                                                                                                                   | 0        | 0       |
| Trans04  | Ethanol <-> Ethanol-ex + H <sup>+</sup>                                                                                                                                                                                                  | 3.7404   | 4.6889  |
| Trans05  | CO <sub>2</sub> <-> CO <sub>2</sub> -ex                                                                                                                                                                                                  | 63.5148  | 74.884  |
| Trans06  | Pi <-> Pi-ex + H <sup>+</sup>                                                                                                                                                                                                            | 67.2552  | 79.5729 |
| Trans08  | H <sub>2</sub> <-> H <sub>2</sub> -ex                                                                                                                                                                                                    | 3.7404   | 4.6889  |
| Trans11  | Lactate <-> Lactate-ex + H <sup>+</sup>                                                                                                                                                                                                  | 67.2552  | 79.5729 |
| Trans12  | 2,3-butanediol <-> 2,3-butanediol-ex                                                                                                                                                                                                     | 0        | 0       |
| Trans13  | Glycerol-ex -> Glycerol                                                                                                                                                                                                                  | 0        | 0       |
